# Supplementary material for: Pharmacokinetic research in children: an analysis of registered records of clinical trials
Source: PubMed Central journal article supplement — BMJ Open. 2011 Aug 9;1(1):e000221. doi: 10.1136/bmjopen-2011-000221 (PMC3191584; doi:10.1136/bmjopen-2011-000221), 2011-08-09
Supplement: bmjopen-2011-000221.draft_revisions.pdf [file bmjopen-2011-000221.draft_revisions.pdf]

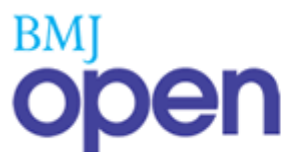

**Pharmacokinetic research in children: an analysis of registered records of clinical trials**

|                                 |                                                                                                                                                                                                                                                                                                                                                                                                                                   |
|---------------------------------|-----------------------------------------------------------------------------------------------------------------------------------------------------------------------------------------------------------------------------------------------------------------------------------------------------------------------------------------------------------------------------------------------------------------------------------|
| Journal:                        | <i>BMJ Open</i>                                                                                                                                                                                                                                                                                                                                                                                                                   |
| Manuscript ID:                  | bmjopen-2011-000221                                                                                                                                                                                                                                                                                                                                                                                                               |
| Article Type:                   | Research                                                                                                                                                                                                                                                                                                                                                                                                                          |
| Date Submitted by the Author:   | 15-Jun-2011                                                                                                                                                                                                                                                                                                                                                                                                                       |
| Complete List of Authors:       | Viergever, Roderik; World Health Organization (WHO), International Clinical Trials Registry Platform (ICTRP), Department of Research Policy and Cooperation (RPC)<br>Rademaker, Carin; University Medical Center Utrecht (UMCU), Department of Clinical Pharmacy<br>Gherzi, Davina; World Health Organization (WHO), International Clinical Trials Registry Platform (ICTRP), Department of Research Policy and Cooperation (RPC) |
| <b>Primary Subject Heading</b>: | Paediatrics                                                                                                                                                                                                                                                                                                                                                                                                                       |
| Keywords:                       | PAEDIATRICS, PUBLIC HEALTH, Health policy < HEALTH SERVICES ADMINISTRATION & MANAGEMENT                                                                                                                                                                                                                                                                                                                                           |
|                                 |                                                                                                                                                                                                                                                                                                                                                                                                                                   |

SCHOLARONE™  
Manuscripts

# Pharmacokinetic research in children: an analysis of registered records of clinical trials

Roderik F. Viergever, MD, MSc<sup>1</sup>

Carin M.A. Rademaker, PharmD, PhD<sup>2</sup>

Davina Gherzi, MPH, PhD<sup>1</sup>

<sup>1</sup> International Clinical Trials Registry Platform (ICTRP), Department of Research Policy and Cooperation (RPC), World Health Organization (WHO), Geneva, Switzerland

<sup>2</sup> Department of Clinical Pharmacy, University Medical Center Utrecht (UMCU), Utrecht, the Netherlands

Keywords: pharmacokinetics, clinical trials registration, paediatrics, pharmacology, clinical trial

Number of words (main text): 2993, (abstract): 260, Number of tables: 2, Number of figures: 3

Corresponding author:

Roderik F. Viergever

Postal address: London School of Hygiene and Tropical Medicine, 15-17 Tavistock Place, WC1H 9SH, London, United Kingdom

Email: [roderik.viergever@lshtm.ac.uk](mailto:roderik.viergever@lshtm.ac.uk)

## ABSTRACT

### Background

Reported off-label/unlicensed prescribing rates in children range from 11% to 80%. Research into pharmacokinetic profiles of children's medicines is essential in the creation of more knowledge on the safety and efficacy of medicines in children. This study investigated how often pharmacokinetic data are collected in clinical trials of medicines in children by analysing registered records of clinical trials.

### Methods

The registered records of all clinical trials in children that were recruiting on 22 May 2009 were identified on the International Clinical Trials Registry Platform (ICTRP) using a Clinical Trials in Children search filter. The records of trials in children below 12 years of age, in which the intervention was one or more medicines, were assessed for evidence that pharmacokinetic data would be collected.

### Results

Of 1081 eligible trial records, 257 (24%) declared that pharmacokinetic data would be collected. Of these trials, 199 (77%) recruited in Northern America; recruitment in all other regions was below 20%. Trials recruited most often in children over 2 years of age (74%), and least often in newborn infants (32%). Most trials researched medicines in the field of cancer (29%). Trials investigated one third of the medicines that were indicated as a priority for pharmacokinetic research by the European Medicines Agency.

### Conclusions

There is a need for increased knowledge of the pharmacokinetic profiles of children's medicines. The amount of currently ongoing pharmacokinetic research does not seem to adequately address the lack of knowledge in this area. This study sets a baseline for monitoring of future progress on the amount of ongoing pharmacokinetic research in children.

## ARTICLE SUMMARY

### Article focus

- The main aim of this study was to assess how many registered records of clinical trials of medicines that were recruiting children and were identifiable on the ICTRP Search Portal contained evidence that pharmacokinetic data would be collected.
- Secondary aims were to assess which pharmacokinetic data were collected and what types of trials were reporting pharmacokinetic data.

### Key messages

- This study quantifies, for the first time, the amount of currently ongoing research into pharmacokinetic profiles of medicines in children.
- It shows how much and what kind of pharmacokinetic research is being carried out worldwide as registered at clinical trial registries and analyses the types of trials that perform this research.
- It sets a baseline for future studies, to monitor progress in the amount of pharmacokinetic research that is performed in children.

### Strengths and limitations of this study

#### Strengths:

Our study is one of the first studies of its kind, in that it has created a comprehensive oversight of the amount of ongoing research in one particular research area, by analysing information in registered records of clinical trials. Using information in clinical trial databases as such offers a unique, and currently underused, method for informing future research prioritisation efforts at a policy level (in our case of paediatric off-patent medicines by the European Medicines Agency).

#### Limitations:

This study is limited by the quality of information in the included registered records. Studying registered records of clinical trials is not the same as studying how clinical trials were in fact conducted. However, in the absence of open access to complete trial protocols we have no other choice than to use the information entered into a trial registry for this type of analysis.

## INTRODUCTION

Knowledge on the efficacy and safety of medicines for children is still very limited. Off-label (outside the product license) and unlicensed (without a license for children) prescription rates in children range from 11% to 80%.[1] Only 20-30% of drugs that have been approved by the U.S. Food and Drug Administration (FDA) in the past, were also labelled for use in children.[2] Adult dosing cannot be logically extrapolated to paediatric dosing according to weight or age because of different pharmacokinetic and pharmacodynamic profiles in children as compared to adults.[3-5] Differences in drug metabolism between children and adults also lead to differences in susceptibility to adverse drug reactions.[6] Worryingly, adverse drug reactions have been shown to occur more frequently with off-label prescribed drugs.[7] The magnitude of this problem is exemplified by one source which estimates that almost one quarter of all children in the US used at least one prescription drug in the last month and that the total number of drugs used per 100 children in the US over 2004 and 2005 was 338.4.[8] To accelerate progress towards improved availability and access to safe child-specific medicines for all children below 12 years of age, the 'Make medicines child size' campaign was launched by the World Health Organization (WHO) in 2007.[9]

It has been a requirement of the International Committee of Medical Journal Editors (ICMJE) since 2004 that all clinical trials be prospectively registered in a publicly available clinical trials registry in order to be considered for publication of trial results.[10] As of April 2011 the WHO International Clinical Trials Registry Platform (ICTRP) offers a single point of access (the ICTRP Search Portal) to data from over 130,000 clinical trials made available by clinical trial registries around the world.[11] The importance of high quality information on clinical trials recruiting children is increasingly being recognised. The Pan African Clinical Trials Registry (PACTR) (a WHO Primary Registry to the ICTRP) has, for example, recently created a child strategy,[12] and the European Union has implemented legislation mandating that the EudraCT database of clinical trials "should include a European register of clinical trials of medicinal products for paediatric use".[13] To improve access to information on clinical trials in children for health care workers, researchers, and patients and their parents, the ICTRP has developed a filter (referred to as the Clinical Trials in Children or CTC filter) on the ICTRP Search Portal which makes it possible to search the portal for clinical trials in children with reasonable accuracy.[14]

1  
2  
3  
4  
5 Collecting pharmacokinetic data in paediatric drug trials is fundamental in the development of a larger  
6  
7 body of evidence on the safety and efficacy of children's medicines. The aim of this study was to  
8  
9 assess how many registered records of clinical trials of medicines that were recruiting children and  
10  
11 were identifiable on the ICTRP Search Portal contained evidence that pharmacokinetic data would be  
12  
13 collected.

## 14 15 16 **METHODS**

### 17 18 **Data sources**

19 The ICTRP Search Portal imports the WHO Trial Registration Data Set (the minimum amount of trial  
20  
21 information that must appear in a register in order for a given trial to be considered fully registered)  
22  
23 from registries that meet WHO criteria, including ClinicalTrials.gov.[15] As the format of each data item  
24  
25 differs across registries, data are currently imported into the portal as text. The ICTRP publishes a  
26  
27 hyperlink to the record in the source registry (i.e. the registry that provided the data) so users can view  
28  
29 additional information, if required. At the time of this study, nine registries provided data to the ICTRP:  
30  
31 The Australian New Zealand Clinical Trials Registry (ANZCTR), the Chinese Clinical Trial Register  
32  
33 (ChiCTR), the Clinical Trials Registry - India (CTRI), ClinicalTrials.gov, the German Clinical Trials  
34  
35 Register (DRKS), the Iranian Registry of Clinical Trials (IRCT), the International Standard Randomized  
36  
37 Controlled Trial Number Register (ISRCTN), the Netherlands National Trial Register (NTR), and the  
38  
39 Sri Lanka Clinical Trials Registry (SLCTR).  
40  
41  
42

43 During this study, the CTC filter operated through a search paradigm of over 4000 keywords that were  
44  
45 compiled by consulting child health experts who identified key terms relevant to children and  
46  
47 adolescents.[14]  
48  
49

### 50 51 **Study selection**

52 The ICTRP database was searched for all recruiting, interventional clinical trials in children using the  
53  
54 CTC filter. The resulting records were scanned manually for eligibility. To be eligible, trial records  
55  
56 needed to describe trials that included children below 12 years of age. For trials where inclusion of  
57  
58 participants below 12 years was unclear from the record, the record was considered eligible only when  
59  
60 an explicit statement was present that the trial was recruiting children, or when the investigated

1  
2  
3 disease was listed as child-specific in the CTC search filter keyword database. When a trial  
4  
5 researched an intervention in pregnant mothers, records were only included when outcomes were  
6  
7 defined for the child.

8  
9 Eligible trials also needed to have at least one arm that involved the evaluation of one or more  
10  
11 medicines. Interventions were coded to be medicines or not by using the coding system for  
12  
13 intervention types on ClinicalTrials.gov.[16] Interventions that were drugs, biologicals or dietary  
14  
15 supplements were considered to be medicines. Excluded were records of trials that researched  
16  
17 general dietary interventions (as opposed to dietary supplements), vaccines, IV fluids (without  
18  
19 mentioning of specific substance names), oxygen and nitric or nitrous oxide treatments,  
20  
21 transplantations or transfusions, sucrose and glucose water for treatment of pain in newborns, alcohol  
22  
23 cleansing of intravenous materials, somatic cell transplants and transfusions, pro- and prebiotics, and  
24  
25 surfactant treatments.

### 26 27 28 **Data extraction**

29  
30 The following information was collected manually for all eligible registered records: the age of included  
31  
32 participants, country / countries of recruitment, study phase, and nature of sponsorship. Geographical  
33  
34 regions of the United Nations Statistics Division were used to group countries.[17] Age of participants  
35  
36 was categorised according to the International Conference on Harmonisation topic E11 age  
37  
38 classification of paediatric patients.[18]

39  
40  
41  
42 Eligible registered records were searched for the presence or absence of collection of pharmacokinetic  
43  
44 data. Pharmacokinetic data were defined as parameters that describe the fate of externally  
45  
46 administered substances to humans after administration. Both parameters of the drug and its  
47  
48 metabolites were denoted to be pharmacokinetic data (e.g. 25(OH)D or 1,25(OH)<sub>2</sub>D levels were  
49  
50 recorded as pharmacokinetic outcomes of vitamin D treatment). Collection of pharmacokinetic data  
51  
52 could be mentioned in the outcome entry fields or elsewhere in the record.

53  
54  
55  
56 It was determined whether pharmacokinetics were recorded as a primary or a secondary outcome  
57  
58 measure (if collection of pharmacokinetic data was mentioned outside the outcome fields, it was  
59  
60 denoted a secondary outcome measure). Furthermore, it was documented which of the following  
pharmacokinetic data were studied: absorption, area under the curve (AUC) of plasma or tissue

1  
2  
3 concentration, autoinduction response, balance, bioavailability, breakdown, clearance, distribution,  
4  
5 elimination, excretion, faecal clearance, faecal excretion, lowest concentration, metabolism, peak  
6  
7 concentration, plasma half-life ( $t_{1/2}$ ), plasma or tissue concentration, renal clearance, time to lowest  
8  
9 concentration, time to peak concentration, urinary excretion, volume of distribution, or general  
10  
11 mentioning of pharmacokinetic data collection or a pharmacokinetic study design. Use of a population  
12  
13 pharmacokinetic design and additional general mentioning of pharmacodynamic data collection or the  
14  
15 use of a pharmacodynamic study design were denoted.

16  
17  
18  
19 The primary health condition or problem studied and the drug, biological or dietary supplement that  
20  
21 was under investigation were denoted for trials that reported collection of pharmacokinetic data. The  
22  
23 primary health condition or problem studied was categorised according to WHO ICD-10 chapters.[19]  
24  
25 For drugs, biologicals and dietary supplements, we adhered to the names for the interventions as  
26  
27 denoted in the registered record, except when proprietary names were used, which we converted to  
28  
29 nonproprietary names. When there were multiple medicines described, but there was one main  
30  
31 intervention, and the record lacked specification for which medicines pharmacokinetics would be  
32  
33 determined, it was assumed that pharmacokinetics would be determined for the main intervention. The  
34  
35 drugs, biologicals and dietary supplements that were found were compared with the medicines for  
36  
37 which there was a priority need for pharmacokinetic data, according to the European Medicines  
38  
39 Agency (EMA) revised priority list for studies into off-patent paediatric medicinal products from 2008,  
40  
41 which was the most recent version at the time of this study.[20] Furthermore, we analysed the EMA  
42  
43 2009 and 2010 priority lists to see whether medicines from the 2008 list endured to be priorities for  
44  
45 pharmacokinetic investigation. Lastly, to investigate whether there were trials that studied EMA priority  
46  
47 medicines without collecting pharmacokinetic data, we searched the scientific and public titles of all  
48  
49 studies in our sample for mentioning of the EMA priority medicines.

50  
51  
52 All records were scanned for eligibility by RFV who then, in case of inclusion, extracted and coded the  
53  
54 data. During eligibility assessment and data extraction trial records for which data were ambiguous  
55  
56 were further assessed by DG. Conflicts were resolved by mutual agreement.

57  
58  
59  
60 Microsoft SPSS version 16.0.1 was used for descriptive analyses of the data.



## RESULTS

The ICTRP Search Portal was searched using the CTC filter on 22 May 2009 resulting in the identification of 3051 records of interventional clinical trials in children, of which 1081 were investigating one or more medicines (i.e. the intervention was a drug, biological or dietary supplement) and mentioned inclusion of children below 12 years of age. 257 (24%) of these records reported that pharmacokinetic data would be collected. The medicines that were investigated by the corresponding trials were drugs or biologicals in 209 records (81%) and dietary supplements in 48 records (19%).

The 1081 records of children's trials reported recruitment of participants in 92 countries; the records that reported collection of pharmacokinetic data recruited in 48 countries. Of the 257 records that reported collection of pharmacokinetic data, 199 records (77%) reported recruitment in Northern America; recruitment in all other regions was below 20% (Table 1). Among the 824 records of trials without pharmacokinetic data collection, Northern America was also the most frequent geographical region of recruitment, but less so (57%).

Looking more closely at the age of participants being recruited in trials that reported collection of pharmacokinetic data, 81 records (32%) involved preterm or term newborn infants (0 to 27 days), 126 records (49%) infants and toddlers (28 days to 23 months), and 190 records (74%) children between the ages of 2 and 11 years.

Mention of pharmacokinetic data collection was most frequent in records of trials that were Phase 1 (62%) or Phase 1 and 2 (57%). 39% of all trials that reported pharmacokinetic data collection were Phase 1 or Phase 1 and 2, 43% were Phase 2 to 4 (in 19% of records study phase was not provided). Almost half of the trials that were reported to collect pharmacokinetic data were sponsored by a university or a hospital. Though there were fewer federal (15%) and industry (26%) sponsored trials performing research into medicines in children under 12 years, these trials were more likely to collect pharmacokinetic data (32% and 37% respectively) than university or hospital sponsored studies (19%).

|                                             | Records from trials that reported collection of PK data (N=257) |                     | Records from trials that did not report collection of PK data (N=824) |                     | Total       | Percentage of total reporting collection of PK data per age group, region, Phase, or sponsor |
|---------------------------------------------|-----------------------------------------------------------------|---------------------|-----------------------------------------------------------------------|---------------------|-------------|----------------------------------------------------------------------------------------------|
|                                             | Number of records                                               | Percentage of N=257 | Number of records                                                     | Percentage of N=824 |             |                                                                                              |
| <b>Age<sup>1</sup></b>                      |                                                                 |                     |                                                                       |                     |             |                                                                                              |
| Newborn infants (0 to 27 days)              | 81                                                              | 32%                 | 226                                                                   | 27%                 | 307         | 26%                                                                                          |
| Infants and toddlers (28 days to 23 months) | 126                                                             | 49%                 | 371                                                                   | 45%                 | 497         | 25%                                                                                          |
| children between the ages of 2 and 11 years | 190                                                             | 74%                 | 680                                                                   | 83%                 | 870         | 22%                                                                                          |
| Not indicated                               | 3                                                               | 1%                  | 19                                                                    | 2%                  | 22          | -                                                                                            |
| <b>Geographical region<sup>1</sup></b>      |                                                                 |                     |                                                                       |                     |             |                                                                                              |
| Africa                                      | 16                                                              | 6%                  | 44                                                                    | 5%                  | 60          | 27%                                                                                          |
| Asia                                        | 26                                                              | 10%                 | 94                                                                    | 11%                 | 120         | 22%                                                                                          |
| Europe                                      | 50                                                              | 19%                 | 217                                                                   | 26%                 | 267         | 19%                                                                                          |
| Latin America and the Caribbean             | 25                                                              | 10%                 | 61                                                                    | 7%                  | 86          | 29%                                                                                          |
| Northern America                            | 199                                                             | 77%                 | 469                                                                   | 57%                 | 668         | 30%                                                                                          |
| Oceania                                     | 13                                                              | 5%                  | 83                                                                    | 10%                 | 96          | 14%                                                                                          |
| Not specified                               | 12                                                              | 5%                  | 35                                                                    | 4%                  | 47          | -                                                                                            |
| <b>Phase</b>                                |                                                                 |                     |                                                                       |                     |             |                                                                                              |
| 0                                           | 0                                                               | 0%                  | 3                                                                     | 0%                  | 3           | 0%                                                                                           |
| 1                                           | 69                                                              | 27%                 | 43                                                                    | 5%                  | 112         | 62%                                                                                          |
| 1&2                                         | 31                                                              | 12%                 | 23                                                                    | 3%                  | 54          | 57%                                                                                          |
| 2                                           | 45                                                              | 18%                 | 149                                                                   | 18%                 | 194         | 23%                                                                                          |
| 2&3                                         | 11                                                              | 4%                  | 32                                                                    | 4%                  | 43          | 26%                                                                                          |
| 3                                           | 38                                                              | 15%                 | 215                                                                   | 26%                 | 253         | 15%                                                                                          |
| 3&4                                         | 0                                                               | 0%                  | 4                                                                     | 0%                  | 4           | 0%                                                                                           |
| 4                                           | 15                                                              | 6%                  | 146                                                                   | 18%                 | 161         | 9%                                                                                           |
| Not indicated                               | 48                                                              | 19%                 | 209                                                                   | 25%                 | 257         | -                                                                                            |
| <b>Sponsorship</b>                          |                                                                 |                     |                                                                       |                     |             |                                                                                              |
| Collaborative research groups               | 25                                                              | 10%                 | 80                                                                    | 10%                 | 105         | 24%                                                                                          |
| Federal                                     | 39                                                              | 15%                 | 84                                                                    | 10%                 | 123         | 32%                                                                                          |
| Industry                                    | 67                                                              | 26%                 | 114                                                                   | 14%                 | 181         | 37%                                                                                          |
| University or hospital                      | 121                                                             | 47%                 | 502                                                                   | 61%                 | 623         | 19%                                                                                          |
| Other <sup>2</sup>                          | 5                                                               | 2%                  | 43                                                                    | 5%                  | 48          | 10%                                                                                          |
| Not indicated                               | 0                                                               | 0%                  | 1                                                                     | 0%                  | 1           | -                                                                                            |
| <b>Total</b>                                | <b>257</b>                                                      |                     | <b>824</b>                                                            |                     | <b>1081</b> |                                                                                              |

**Table 1 – Age groups of study participants, geographical regions of recruitment, study phase, and sponsorship of trial records included in the study**

<sup>1</sup> Percentages for geographical regions and age groups do not add up to 100% because records regularly pertain to trials recruiting in multiple regions, or recruiting in multiple age groups.

<sup>2</sup> Other sponsorship included foundations, contract research organizations, research centres, and individuals.

1  
2  
3  
4  
5 Of the 257 records that reported collection of pharmacokinetic data, 56 records (22%) mentioned only  
6 the measuring of serum or tissue concentrations, and did not mention a pharmacokinetic study design,  
7 or any of the other pharmacokinetic parameters (34 of these 56 records (61%) were of trials that  
8 investigated dietary supplements). Which pharmacokinetic data were reported to be collected in  
9 records is shown in more detail in Figure 1. 124 records (48%) reported pharmacokinetic data as a  
10 primary outcome and 163 (63%) reported pharmacokinetic data as a secondary outcome (overlap is  
11 due to mentioning of pharmacokinetic data as both a primary and a secondary outcome measure in 30  
12 records). 11 records (4%) mentioned use of a population pharmacokinetic design. 52 records (20%)  
13 mentioned pharmacodynamic data collection or the use of a pharmacodynamic study design in  
14 addition to pharmacokinetic data collection (out of the 824 records that did not report pharmacokinetic  
15 data collection, 12 records mentioned collection of pharmacodynamic data).  
16  
17  
18  
19  
20  
21  
22  
23  
24  
25  
26  
27  
28

29 The primary health condition or problem studied in trials that collected pharmacokinetic data was most  
30 often cancer (29%) (Figure 2). The distribution of health conditions or problems studied differed per  
31 age group, with less of a propensity for cancer research among the group of newborn infants (Figure  
32 3).  
33  
34  
35  
36  
37  
38

39 A detailed oversight of the medicines that were investigated by trials that reported collection of  
40 pharmacokinetic data can be found in Web Only File 1. Of the 28 medicines on the EMA revised  
41 priority list for studies into off-patent paediatric medicinal products from 2008 for which collection of  
42 pharmacokinetic data was indicated to be a priority, we found 9 medicines (32%) to be investigated in  
43 trials identified in our search (Table 2).  
44  
45  
46  
47  
48

49 Of the 28 medicines that were EMA priorities in 2008, 14 (50%) were still a priority in 2009 and 12 still  
50 in 2010 (43%). Of the 9 medicines for which we found pharmacokinetic data collection, 2 were still a  
51 priority in 2010 (22%). Of the 19 medicines for which we did not find pharmacokinetic data collection,  
52 10 were still a priority in 2010 (53%).  
53  
54  
55

56 Academic and public titles of the 1081 records in the sample were searched for the names of the 19  
57 medicines that we did not find pharmacokinetic data collection for in any record. 8 (42%) of these  
58 medicines were identified in 29 trial records as an intervention.  
59  
60

| Name of medicine        | notes                                             | Investigated in trial records identified on the ICTRP search portal? | Still in 2009 EMA priorities? | Still in 2010 EMA priorities? | Medicine investigated in trials without collection of PK data? | In how many trial records? |
|-------------------------|---------------------------------------------------|----------------------------------------------------------------------|-------------------------------|-------------------------------|----------------------------------------------------------------|----------------------------|
| 6-mercaptopurine        | in infants                                        | yes                                                                  | yes                           | no                            |                                                                |                            |
| Actinomycin             | below the age of 6 years                          | yes                                                                  | no                            | no                            |                                                                |                            |
| Asparaginase            | in infants                                        | yes                                                                  | no                            | no                            |                                                                |                            |
| Baclofen                |                                                   | yes                                                                  | no                            | no                            |                                                                |                            |
| Bumetanide              |                                                   | no                                                                   | no                            | no                            | no                                                             |                            |
| Carboplatin             | below the age of 3 years                          | no                                                                   | no                            | no                            | yes                                                            | 10                         |
| Cladribine              |                                                   | no                                                                   | no                            | no                            | no                                                             |                            |
| Clindamycin             |                                                   | no                                                                   | yes                           | yes                           | no                                                             |                            |
| Clonidine               |                                                   | no                                                                   | yes                           | yes                           | yes                                                            | 6                          |
| Cyclophosphamide        | data on PK of metabolites                         | yes, including metabolites                                           | no                            | no                            |                                                                |                            |
| Cytarabine              | in infants                                        | yes                                                                  | yes                           | no                            |                                                                |                            |
| Daunorubicin            | in infants                                        | yes                                                                  | yes                           | yes                           |                                                                |                            |
| Ethosuximide            |                                                   | no                                                                   | yes                           | yes                           | no                                                             |                            |
| Foscarnet               |                                                   | no                                                                   | no                            | no                            | no                                                             |                            |
| Glibenclamide           | above 6 years and adolescent                      | no                                                                   | yes                           | yes                           | no                                                             |                            |
| Hydrochlorothiazide     |                                                   | no                                                                   | no                            | no                            | no                                                             |                            |
| Ibuprofen               | parenteral formulation                            | no <sup>1</sup>                                                      | yes                           | yes                           | yes                                                            | 1                          |
| Itraconazole            |                                                   | no                                                                   | yes                           | yes                           | no                                                             |                            |
| Levamisole              |                                                   | no                                                                   | no                            | no                            | no                                                             |                            |
| Meropenem               | below 3 months of age                             | no                                                                   | no                            | no                            | no                                                             |                            |
| Metformin               | See <sup>2</sup>                                  | no                                                                   | yes                           | yes                           | yes                                                            | 2                          |
| Midazolam               |                                                   | no                                                                   | no                            | no                            | yes                                                            | 4                          |
| Milrinone               |                                                   | no                                                                   | yes                           | yes                           | yes                                                            | 2                          |
| Oxybutynin              |                                                   | no                                                                   | no                            | no                            | no                                                             |                            |
| Propranolol             |                                                   | no                                                                   | yes                           | yes                           | yes                                                            | 2                          |
| Temozolomide            | in children particularly below the age of 3 years | yes                                                                  | no                            | no                            |                                                                |                            |
| Topotecan               |                                                   | yes                                                                  | yes                           | yes                           |                                                                |                            |
| Unfractionated heparin  |                                                   | no                                                                   | yes                           | yes                           | yes                                                            | 2                          |
| <b>Percentage "yes"</b> |                                                   | 9/28=32%                                                             | 14/28=50%                     | 12/28=43%                     | 8/19=42%                                                       |                            |

**Table 2 - EMA 2008 priorities for PK analysis**

Legend Table 2: This table shows which of the medicines that were identified as a priority for pharmacokinetic (PK) evaluation by the EMA in 2008 were found to collect PK data in our study sample. We also assessed whether these medicines were still

1  
2  
3 present in the EMA 2009 and 2010 priority lists. Lastly, we searched titles of all 1081 trial records in our sample to assess for  
4 which EMA priority medicines trials were conducted without PK data collection (or it was not denoted in the record).

5  
6 <sup>1</sup> One trial investigated ibuprofen pharmacokinetics, but in oral formulation.

7  
8 <sup>2</sup> Data on PK and efficacy in DM II in children above the age of 6 years. Data on PK, efficacy and safety in small-for-gestational-  
9 age children with precocious/early/rapidly progressing puberty.

## 10 11 12 **DISCUSSION**

13  
14 To our knowledge, this is the first study to report on the global activity of collection of pharmacokinetic  
15 data in clinical trials in children. It assessed all paediatric trials that were recruiting on 22 May 2009, as  
16 registered at clinical trial registries that are a part of the ICTRP registry network. Of 1081 records of  
17 trials researching medicines in children, one quarter reported that they would be collecting  
18 pharmacokinetic data. So is this a lot, or a little? In view of the current paucity of knowledge on safety  
19 and efficacy of children's medicines, the degree to which this knowledge is in arrears as compared to  
20 our understanding of adult medication, and the widespread prescribing of medicines to children, we  
21 would argue that it is not enough.  
22  
23  
24  
25  
26  
27  
28  
29  
30

31  
32 The fact that only one fifth of the records that mentioned collection of pharmacokinetic data also  
33 mentioned to be studying pharmacodynamics adds to this conclusion. Additionally, our analysis of the  
34 types of trials researching pharmacokinetics show that there might be significant pharmacokinetic  
35 research gaps in terms of geographical area, studied diseases and age categories. Over 75% of all  
36 studies recruited participants in Northern America, while recruitment in all other geographical regions  
37 was below 20%. This unequal distribution appears to exist for all paediatric drug trials, but especially  
38 for studies collecting pharmacokinetic data. Given the existence of interethnic differences in  
39 pharmacological effects on the body [21] and that many diseases are not prevalent in Northern  
40 America, this gap is a reason for concern. Similarly, the distribution of pharmacokinetic research  
41 across different ICD-10 disease categories suggests that the lacking knowledge of pharmacokinetics  
42 in children is only marginally addressed in some areas. Previous studies have shown that paediatric  
43 research in general often does not address priority research areas.[22, 23] Finally, although  
44 knowledge on pharmacokinetic profiles in children is at an inadequate level for all age groups, the  
45 least is known about pharmacokinetics in the youngest age group of neonates.[24, 25] This study  
46 shows that this age group, worryingly so, is also the least likely to be studied.  
47  
48  
49  
50  
51  
52  
53  
54  
55  
56  
57  
58  
59  
60

1  
2  
3 In addition, trials in our study sample were found to collect pharmacokinetic data only for one third of  
4 the medicines on the EMA priority list for studies into off-patent paediatric medicinal products.[20]  
5  
6 Although our study investigated a cross-sectional sample of recruiting paediatric trials at one moment  
7  
8 in time, one third seems like a low percentage to us. Taking also into consideration that a considerable  
9  
10 amount of medicines endured to be priorities for research over several years, and that there were  
11  
12 ongoing clinical trials in which pharmacokinetic properties of these medicines could potentially have  
13  
14 been studied, this might suggest that more research on pharmacokinetic profiles in children is not only  
15  
16 necessary, but also achievable.  
17  
18

19  
20  
21 The paediatric research community has much to gain from the inclusive database of clinical trials in  
22  
23 children that the ICTRP search portal provides through its Clinical Trials in Children search filter.[26]  
24  
25 Clinical trials registration allows for doctors and patients and their parents to inform themselves more  
26  
27 adequately about trials open to recruitment.[27] It is likely to promote collaboration among  
28  
29 researchers, by facilitating knowledge transfer on currently ongoing research, thus also preventing  
30  
31 duplication of research.[28] Furthermore, it has the potential to contribute to establishing more reliable  
32  
33 research evidence by aiding in the prevention of selective reporting and publication bias.[27, 29]  
34  
35 Although the ethical and legal pressure to adequately report the results of clinical trials is  
36  
37 increasing,[30] selective reporting and publication bias are still important problems.[31, 32] If all trials  
38  
39 (and their outcomes) are registered before start of the trial, researchers that withhold publication of  
40  
41 trial results or the original outcomes because of negative results can be held accountable.[30, 33, 34]  
42  
43 Finally, clinical trials registration facilitates priority setting in paediatric research, identifying gaps  
44  
45 between burden of disease and research efforts in different therapeutic areas.[35] This study confirms  
46  
47 that analysis of clinical trials identified on the ICTRP database can be a powerful tool to  
48  
49 comprehensively assess the amount of currently ongoing research in a particular research area.  
50

51  
52 The need for improved availability of and access to safe child-size medicines has received growing  
53  
54 attention in recent years.[1, 36] WHO addresses this issue through its 'make medicines child size'  
55  
56 campaign.[9] Other initiatives that promote trials on medicines in children include US and EU  
57  
58 legislation.[13, 37] While these legislative measures are a positive development and have resulted in  
59  
60 an increased number of trials being conducted in the paediatric population,[37, 38] they have not been

1  
2  
3 free from critique.[23, 39] Given how crucial pharmacokinetic research is in the creation of more  
4  
5 knowledge on the safety and efficacy of medicines in children and the concerns that the present study  
6  
7 raises on the amount of such research currently being conducted, it is of great importance that the  
8  
9 collection of pharmacokinetic data in clinical trials in children continues to be monitored in the future.  
10  
11 The Clinical Trials in Children search filter of the ICTRP offers a platform to do so.  
12

## 13 14 15 16 **ACKNOWLEDGEMENTS**

17  
18 The authors are indebted to Ghassan Karam for his help in attaining a random sample of registered  
19  
20 records from the ICTRP database, to Dr Anna Ridge for her help in designing the study, and to Dr  
21  
22 Suzanne Hill for her help in designing the study and reviewing early drafts of this manuscript.  
23

## 24 25 26 **CONFLICTS OF INTEREST**

27  
28 DG is Coordinator of the International Clinical Trial Registry Platform (ICTRP) of the World Health  
29  
30 Organization. CMAR and RFV have no conflict of interest to report.  
31

## 32 33 34 **FUNDING SOURCES**

35  
36 This research received no specific grant from any funding agency in the public, commercial or not-for-  
37  
38 profit sectors.  
39

## 40 41 42 **AUTHORS' CONTRIBUTIONS**

43  
44 RFV and DG designed the study, RFV collected the data, RFV, DG and CMAR analysed and  
45  
46 interpreted the data, RFV wrote the first draft of the paper, CMAR and DG contributed to the writing of  
47  
48 the paper, all agree with the manuscript's results and conclusions.  
49

## 50 51 52 **DATA SHARING STATEMENT**

53  
54 Dataset available from the corresponding author at [roderik.viergever@ishtm.ac.uk](mailto:roderik.viergever@ishtm.ac.uk) .  
55  
56

## 57 58 59 **WEB ONLY FILES**

60  
File name: Web Only file 1

1  
2  
3 Format: Excel (.xls)

4  
5 Title of data: Medicines that were researched in trials that collected pharmacokinetic data

6  
7 Description of data: This file describes the names of the medicines (drugs, biologicals or dietary  
8  
9 supplements) as mentioned in the 257 trial records that reported collection of pharmacokinetic data.  
10  
11  
12  
13  
14  
15  
16  
17  
18  
19  
20  
21  
22  
23  
24  
25  
26  
27  
28  
29  
30  
31  
32  
33  
34  
35  
36  
37  
38  
39  
40  
41  
42  
43  
44  
45  
46  
47  
48  
49  
50  
51  
52  
53  
54  
55  
56  
57  
58  
59  
60

For peer review only



## FIGURE LEGENDS

### Figure 1 – Collected pharmacokinetic (PK) data in paediatric drug trials

Legend Figure 1: Every first bar represents which pharmacokinetic data were reported as a primary outcome, every second bar those that were reported as a secondary outcome.

### Figure 2 – Investigated health conditions or problems in trials that collected pharmacokinetic data

Legend Figure 2: -

### Figure 3 – Investigated health conditions or problems per age group

Legend Figure 3: The graph on the top left displays the distribution of health conditions or problems studied in trials that recruited only newborn infants; the top right graph displays this information for trials that recruited only infants/toddlers; the middle left graph for trials that recruited only children > 2 years of age; the middle right graph for trials that recruited newborn infants and infants/toddlers; the lower left graph for trials that recruited infants/toddlers and children > 2 years of age; and the lower right graph for trials that recruited newborn infants, infants/toddlers, and children > 2years of age.

## REFERENCES

1. Pandolfini C, Bonati M. A literature review on off-label drug use in children. *Eur J Pediatr* 2005;**164**:552-558.
2. Meadows M. Drug research and children. *FDA Consum* 2003;**37**:12-17.
3. Ginsberg G, Hattis D, Sonawane B, Russ A, Banati P, Kozlak M, Smolenski S, Goble R. Evaluation of child/adult pharmacokinetic differences from a database derived from the therapeutic drug literature. *Toxicol Sci* 2002;**66**:185-200.
4. Kearns GL, Abdel-Rahman SM, Alander SW, Blowey DL, Leeder JS, Kauffman RE. Developmental pharmacology--drug disposition, action, and therapy in infants and children. *N Engl J Med* 2003;**349**:1157-1167.
5. Yokoi T. Essentials for starting a pediatric clinical study (1): Pharmacokinetics in children. *J Toxicol Sci* 2009;**34 Suppl 2**:SP307-SP312.
6. Johnson TN. The development of drug metabolising enzymes and their influence on the susceptibility to adverse drug reactions in children. *Toxicology* 2003;**192**:37-48.
7. Impicciatore P, Mohn A, Chiarelli F, Pandolfini C, Bonati M. Adverse drug reactions to off-label drugs on a paediatric ward: An Italian prospective study. *Paediatr Perinat Dr Ther* 2002;**5**:19-24.
8. Health, United States, 2009: With Special Feature on Medical Technology. Hyattsville, MD: National Center for Health Statistics 2010.
9. Essential medicines for children, make medicines child size. <http://www.who.int/childmedicines/en/index.html> (accessed 15 Jun 2011).
10. Clinical Trial Registration: A statement from the International Committee of Medical Journal Editors. [http://www.icmje.org/clin\\_trial.pdf](http://www.icmje.org/clin_trial.pdf) (accessed 15 Jun 2011).
11. WHO International Clinical Trials Registry Platform (ICTRP). <http://www.who.int/ictrp> (accessed 15 Jun 2011).
12. Baleta A. African trials registry launches child strategy. *Lancet* 2010;**375**:1423.
13. Regulation (EC) No 1901/2006 of the European Parliament and the Council: on medicinal products for paediatric use (L 378).
14. WHO International Clinical Trials Registry Platform (ICTRP), Clinical Trials in Children. <http://www.who.int/ictrp/child/search/en/index.html> (accessed 15 Jun 2011).
15. WHO Trial Registration Data Set (TRDS). <http://www.who.int/ictrp/network/trds/en/index.html> (accessed 15 Jun 2011).
16. Protocol Data Element Definitions (DRAFT). <http://prsinfo.clinicaltrials.gov/definitions.html> (accessed 15 Jun 2011).
17. Composition of macro geographical (continental) regions, geographical sub-regions, and selected economic and other groupings. <http://unstats.un.org/unsd/methods/m49/m49regin.htm> (accessed 15 Jun 2011).
18. ICH Topic E 11 Clinical Investigation of Medicinal Products in the Paediatric Population. [http://www.ema.europa.eu/docs/en\\_GB/document\\_library/Scientific\\_guideline/2009/09/WC500002926.pdf](http://www.ema.europa.eu/docs/en_GB/document_library/Scientific_guideline/2009/09/WC500002926.pdf) (accessed 15 Jun 2011).
19. International Statistical Classification of Diseases and Related Health Problems 10th Revision. <http://apps.who.int/classifications/apps/icd/icd10online/> (accessed 15 Jun 2011).
20. Revised priority list for studies into off-patent paediatric medicinal products. London: European Medicines Agency 2008.
21. Xie HG, Kim RB, Wood AJ, Stein CM. Molecular basis of ethnic differences in drug disposition and response. *Annu Rev Pharmacol Toxicol* 2001;**41**:815-850.
22. Pandolfini C, Bonati M. Something is moving in European drug research for children, but a more focused effort concerning all therapeutic needs is necessary. *Arch Dis Child* 2008;**93**:715.
23. Boots I, Sukhai RN, Klein RH, Holl RA, Wit JM, Cohen AF, Burggraaf J. Stimulation programs for pediatric drug research--do children really benefit? *Eur J Pediatr* 2007;**166**:849-855.
24. Conroy S, McIntyre J. The use of unlicensed and off-label medicines in the neonate. *Semin Fetal Neonatal Med* 2005;**10**:115-122.
25. Conroy S, McIntyre J, Choonara I. Unlicensed and off label drug use in neonates. *Arch Dis Child Fetal Neonatal Ed* 1999;**80**:F142-144;discussion F144-145.

- 1
  - 2
  - 3
  - 4
  - 5
  - 6
  - 7
  - 8
  - 9
  - 10
  - 11
  - 12
  - 13
  - 14
  - 15
  - 16
  - 17
  - 18
  - 19
  - 20
  - 21
  - 22
  - 23
  - 24
  - 25
  - 26
  - 27
  - 28
  - 29
  - 30
  - 31
  - 32
  - 33
  - 34
  - 35
  - 36
  - 37
  - 38
  - 39
  - 40
  - 41
  - 42
  - 43
  - 44
  - 45
  - 46
  - 47
  - 48
  - 49
  - 50
  - 51
  - 52
  - 53
  - 54
  - 55
  - 56
  - 57
  - 58
  - 59
  - 60
26. Pandolfini C, Bonati M, Sammons HM. Registration of trials in children: update of current international initiatives. *Arch Dis Child* 2009;**94**:717-719.
27. Antes G. Registering clinical trials is necessary for ethical, scientific and economic reasons. *Bull World Health Organ* 2004;**82**:321.
28. Antes G, Dickersin K. Trial registration to prevent duplicate publication. *JAMA* 2004;**291**:2432.
29. Viergever RF, Gherzi D. The quality of registration of clinical trials. *PLoS ONE* 2011;**6**:e14701.
30. Gherzi D, Clarke M, Berlin J, Gulmezoglu A, Kush R, Lumbiganon P, Moher D, Rockhold F, Sim I, Wager E. Reporting the findings of clinical trials: a discussion paper. *Bull World Health Organ* 2008;**86**:492-493.
31. Dwan K, Altman DG, Arnaiz JA, Bloom J, Chan AW, Cronin E, Decullier E, Easterbrook PJ, Von EE, Gamble C, et al. Systematic review of the empirical evidence of study publication bias and outcome reporting bias. *PLoS ONE* 2008;**3**:e3081.
32. Scherer RW, Langenberg P, von Elm E. Full publication of results initially presented in abstracts. *Cochrane Database of Systematic Reviews* 2007; Issue 2 ArtNo: MR000005 DOI: 101002/14651858MR000005pub3.
33. Mathieu S, Boutron I, Moher D, Altman DG, Ravaud P. Comparison of registered and published primary outcomes in randomized controlled trials. *JAMA* 2009;**302**:977-984.
34. Ross JS, Mulvey GK, Hines EM, Nissen SE, Krumholz HM. Trial publication after registration in ClinicalTrials.gov: a cross-sectional analysis. *PLoS Med* 2009;**6**:e1000144.
35. Pandolfini C, Bonati M, Rossi V, Santoro E, Choonara I, Naylor C, Sammons H, Jacqz-Aigrain E, Zarrabian S, Arnau JM, et al. The DEC-net European register of paediatric drug therapy trials: contents and context. *Eur J Clin Pharmacol* 2008;**64**:611-617.
36. Saint-Raymond A, Seigneuret N. Medicines for children: time for Europe to act. *Paediatr Perinat Dr Ther* 2005;**6**:142-146.
37. Benjamin DK, Jr., Smith PB, Murphy MD, Roberts R, Mathis L, Avant D, Califf RM, Li JS. Peer-reviewed publication of clinical trials completed for pediatric exclusivity. *JAMA* 2006;**296**:1266-1273.
38. Rocchi F, Paolucci P, Ceci A, Rossi P. The European paediatric legislation: benefits and perspectives. *Ital J Pediatr* 2010;**36**:56.
39. Permanand G, Mossialos E, McKee M. The EU's new paediatric medicines legislation: serving children's needs? *Arch Dis Child* 2007;**92**:808-811.

1  
2  
3  
4  
5  
6  
7  
8  
9  
10  
11  
12  
13  
14  
15  
16  
17  
18  
19  
20  
21  
22  
23  
24  
25  
26  
27  
28  
29  
30  
31  
32  
33  
34  
35  
36  
37  
38  
39  
40  
41  
42  
43  
44  
45  
46  
47  
48  
49  
50  
51  
52  
53  
54  
55  
56  
57  
58  
59  
60

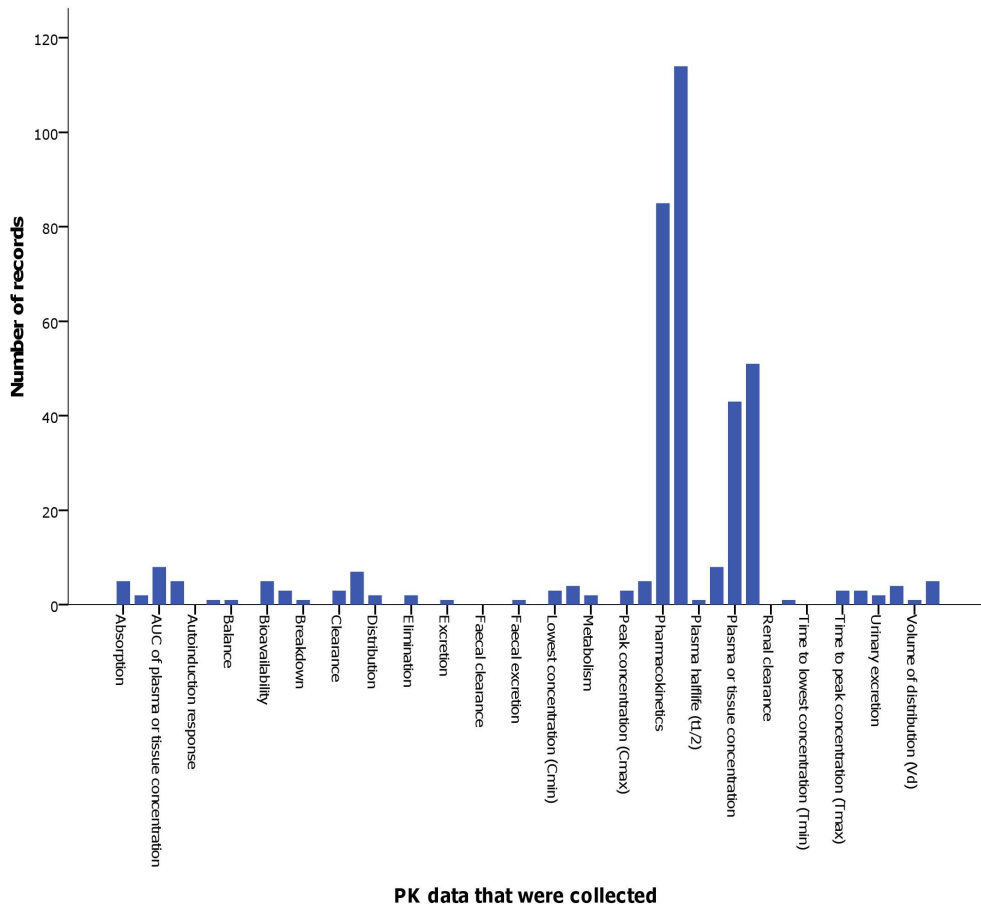

Figure 1 - Every first bar represents which pharmacokinetic data were reported as a primary outcome, every second bar those that were reported as a secondary outcome.

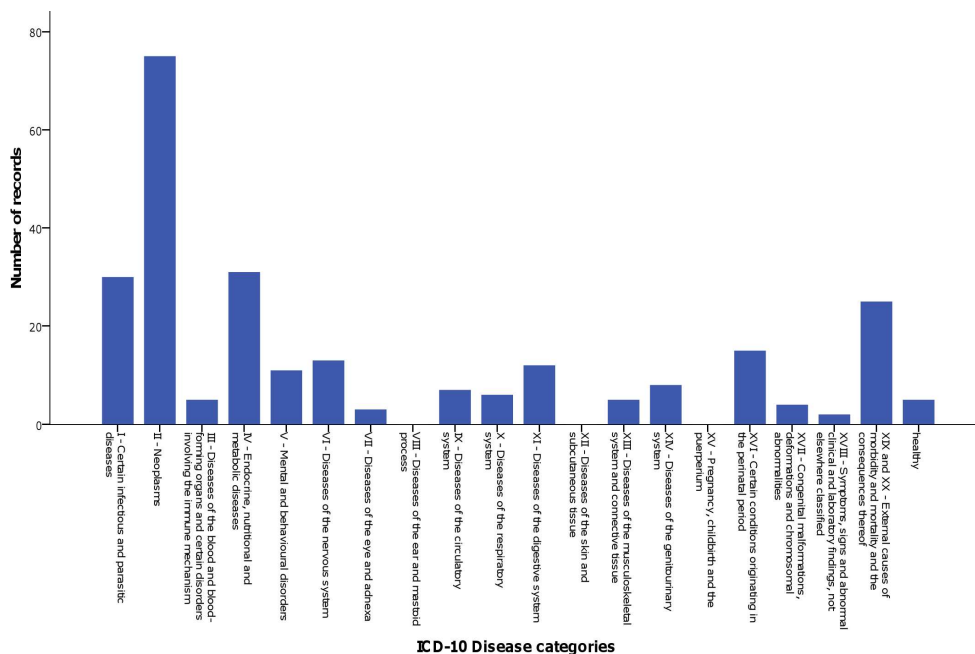

Figure 2



STROBE Statement—Checklist of items that should be included in reports of *cross-sectional studies*

|                              | Item No | Recommendation                                                                                                                                                                                                                                                                                                                                                                                                               |
|------------------------------|---------|------------------------------------------------------------------------------------------------------------------------------------------------------------------------------------------------------------------------------------------------------------------------------------------------------------------------------------------------------------------------------------------------------------------------------|
| <b>Title and abstract</b>    | 1       | <p>(a) Indicate the study's design with a commonly used term in the title or the abstract</p> <p>(b) Provide in the abstract an informative and balanced summary of what was done and what was found</p>                                                                                                                                                                                                                     |
| <b>Introduction</b>          |         |                                                                                                                                                                                                                                                                                                                                                                                                                              |
| Background/rationale         | 2       | Explain the scientific background and rationale for the investigation being reported                                                                                                                                                                                                                                                                                                                                         |
| Objectives                   | 3       | State specific objectives, including any prespecified hypotheses                                                                                                                                                                                                                                                                                                                                                             |
| <b>Methods</b>               |         |                                                                                                                                                                                                                                                                                                                                                                                                                              |
| Study design                 | 4       | Present key elements of study design early in the paper                                                                                                                                                                                                                                                                                                                                                                      |
| Setting                      | 5       | Describe the setting, locations, and relevant dates, including periods of recruitment, exposure, follow-up, and data collection                                                                                                                                                                                                                                                                                              |
| Participants                 | 6       | (a) Give the eligibility criteria, and the sources and methods of selection of participants <i>eligible records</i>                                                                                                                                                                                                                                                                                                          |
| Variables                    | 7       | Clearly define all outcomes, exposures, predictors, potential confounders, and effect modifiers. Give diagnostic criteria, if applicable                                                                                                                                                                                                                                                                                     |
| Data sources/<br>measurement | 8*      | For each variable of interest, give sources of data and details of methods of assessment (measurement). Describe comparability of assessment methods if there is more than one group                                                                                                                                                                                                                                         |
| Bias                         | 9       | Describe any efforts to address potential sources of bias                                                                                                                                                                                                                                                                                                                                                                    |
| Study size                   | 10      | Explain how the study size was arrived at                                                                                                                                                                                                                                                                                                                                                                                    |
| Quantitative variables       | 11      | Explain how quantitative variables were handled in the analyses. If applicable, describe which groupings were chosen and why                                                                                                                                                                                                                                                                                                 |
| Statistical methods          | 12      | <p>(a) Describe all statistical methods, including those used to control for confounding</p> <p>(b) Describe any methods used to examine subgroups and interactions</p> <p>(c) Explain how missing data were addressed</p> <p>(d) If applicable, describe analytical methods taking account of sampling strategy</p> <p>(e) Describe any sensitivity analyses</p>                                                            |
| <b>Results</b>               |         |                                                                                                                                                                                                                                                                                                                                                                                                                              |
| Participants                 | 13*     | <p>(a) Report numbers of <i>trial records</i> individuals at each stage of study—eg numbers potentially eligible, examined for eligibility, confirmed eligible, included in the study, completing follow-up, and analysed</p> <p>(b) Give reasons for non-participation at each stage</p> <p>(c) Consider use of a flow diagram <i>→ deleted upon suggestion of peer-reviewer</i></p>                                        |
| Descriptive data             | 14*     | <p>(a) Give characteristics of <i>included trial records</i> study participants (eg demographic, clinical, social) and information on exposures and potential confounders</p> <p>(b) Indicate number of <i>trial records</i> participants with missing data for each variable of interest</p>                                                                                                                                |
| Outcome data                 | 15*     | Report numbers of outcome events or summary measures                                                                                                                                                                                                                                                                                                                                                                         |
| Main results                 | 16      | <p>(a) Give unadjusted estimates and, if applicable, confounder-adjusted estimates and their precision (eg, 95% confidence interval). Make clear which confounders were adjusted for and why they were included</p> <p>(b) Report category boundaries when continuous variables were categorized</p> <p>(c) If relevant, consider translating estimates of relative risk into absolute risk for a meaningful time period</p> |
| Other analyses               | 17      | Report other analyses done—eg analyses of subgroups and interactions, and sensitivity analyses                                                                                                                                                                                                                                                                                                                               |

|                          |      |                                                                                                                                                                            |
|--------------------------|------|----------------------------------------------------------------------------------------------------------------------------------------------------------------------------|
| <b>Discussion</b>        |      |                                                                                                                                                                            |
| Key results              | 18 ✓ | Summarise key results with reference to study objectives                                                                                                                   |
| Limitations              | 19 ✓ | Discuss limitations of the study, taking into account sources of potential bias or imprecision. Discuss both direction and magnitude of any potential bias                 |
| Interpretation           | 20 ✓ | Give a cautious overall interpretation of results considering objectives, limitations, multiplicity of analyses, results from similar studies, and other relevant evidence |
| Generalisability         | 21 ✓ | Discuss the generalisability (external validity) of the study results                                                                                                      |
| <b>Other information</b> |      |                                                                                                                                                                            |
| Funding                  | 22 ✓ | Give the source of funding and the role of the funders for the present study and, if applicable, for the original study on which the present article is based              |

\*Give information separately for exposed and unexposed groups.

**Note:** An Explanation and Elaboration article discusses each checklist item and gives methodological background and published examples of transparent reporting. The STROBE checklist is best used in conjunction with this article (freely available on the Web sites of PLoS Medicine at <http://www.plosmedicine.org/>, Annals of Internal Medicine at <http://www.annals.org/>, and Epidemiology at <http://www.epidem.com/>). Information on the STROBE Initiative is available at [www.strobe-statement.org](http://www.strobe-statement.org).
